# Supplementary material for: Regular Sport Activity Is Able to Reduce the Level of Genomic Damage
Source: MDPI journal article supplement (doi:10.3390/biology12081110), 2023-08-09
Supplement: s1 [file s1]

Table S1. Gene Polymorphisms, Reference Sequence (rs) numbers, Primers, annealing temperatures and genotyping methodologies used

| Gene Symbols                   | Studied polymorphisms | Polymorphism NCBI | Primer sequence                                                                                 | T (°C) | Methodology      | PCR Product size (bp)                                                     | References |
|--------------------------------|-----------------------|-------------------|-------------------------------------------------------------------------------------------------|--------|------------------|---------------------------------------------------------------------------|------------|
| <i>CYP1A1</i><br><i>exon 7</i> | (A>G)<br>(Ile462Val)  | rs1048943         | 5'- AAGACCTCCCAGCGGGCAAT - 3'<br>5'- AAGACCTCCCAGCGGGCAAC - 3'<br>5'- CTCTGGTTACAGGAAGCTAT - 3' | 60     | ARMS-PCR         | 162                                                                       | [40]       |
| <i>GSTM1</i>                   | Presence/absence      | rs1183423000      | 5- CTGGATTGTAGCAGATCATGC - 3'<br>5'- CTGCCCTACTTGATTGATGGG - 3'                                 | 65     | PCR              | 273                                                                       | [41]       |
| <i>GSTT1</i>                   | Presence/Absence      | rs1601993659      | 5'- TTCCTTACTGGTCCTCACATCTC - 3'<br>5'- TCACCGGATCATGGCCAGCA - 3'                               | 63     | PCR              | 480                                                                       | [42]       |
| <i>XRCC1</i>                   | (C>T)<br>(Arg194Trp)  | rs1799782         | 5'- GCCCCGTCCCAGGTA - 3'<br>5'- AGCCCCAAGACCCTTTCACT - 3'                                       | 60     | RFLP<br>(MspI)   | Undigested Product: 383 bp<br>C-allele = 346 + 37 bp<br>T-allele = 383 bp | [43]       |
| <i>XPC</i><br><i>exon 15</i>   | (A>C)<br>(Lys939Gln)  | rs2228001         | 5' - ACCAGCTCTCAAGCAGAAGC - 3'<br>5' - CTGCCTCAGTTTGCCTTCTC - 3'                                | 60     | RFLP<br>(Pvu II) | Undigested Product: 281 bp<br>A-allele = 281<br>C-allele = 150+131 bp     | [44]       |
